# Supplementary material for: Improving Preclinic Preparation for Patients with Chronic Conditions in Quito, Ecuador: A Randomized Controlled Trial
Source: PubMed Central journal article supplement (PMC4390100; doi:10.1155/2015/724245), 2015-03-25
Supplement: 724245.f1.pdf [file 724245.f1.pdf]

**INTAKE FORM**

ID: \_\_\_\_\_

**1. I have the following conditions:**

- |                                                   |                                                     |
|---------------------------------------------------|-----------------------------------------------------|
| <input type="checkbox"/> Anemia                   | <input type="checkbox"/> Problems with your lungs   |
| <input type="checkbox"/> Arthritis                | <input type="checkbox"/> Problems with your heart   |
| <input type="checkbox"/> Ashma/Rhinitis/Sinusitis | <input type="checkbox"/> Problems with your kidneys |
| <input type="checkbox"/> Cáncer                   | <input type="checkbox"/> Liver disease              |
| <input type="checkbox"/> Depresión                | <input type="checkbox"/> Thyroid problems           |
| <input type="checkbox"/> Diabetes                 | <input type="checkbox"/> Gastritis                  |
| <input type="checkbox"/> Migraines                | <input type="checkbox"/> Obesity                    |
| <input type="checkbox"/> Anxiety                  | <input type="checkbox"/> Back Pain                  |
| <input type="checkbox"/> High Cholesterol         | <input type="checkbox"/> Epilepsy                   |
| <input type="checkbox"/> High Blood Pressure      | <input type="checkbox"/> Other chronic conditions   |

**2. I have the following symptoms:**

- |                                                   |                                                            |
|---------------------------------------------------|------------------------------------------------------------|
| <input type="checkbox"/> Pain in _____            | <input type="checkbox"/> Difficulty urinating              |
| <input type="checkbox"/> Sadness                  | <input type="checkbox"/> Vaginal secretions                |
| <input type="checkbox"/> Weakness                 | <input type="checkbox"/> Vision problems                   |
| <input type="checkbox"/> Diarrhea or constipation | <input type="checkbox"/> Tingling in the lower extremities |
| <input type="checkbox"/> Shortness of breath      | <input type="checkbox"/> Involuntary weight loss           |
| <input type="checkbox"/> Trouble breathing        | <input type="checkbox"/> Non-healing wounds                |
| <input type="checkbox"/> Chest pain               | <input type="checkbox"/> Acid reflux                       |
| <input type="checkbox"/> Body aches               | <input type="checkbox"/> Cough, greater than 2 weeks       |
|                                                   | Other: _____                                               |

**3. MEDICAL HISTORY**

- a. Occupation \_\_\_\_\_
- b. Do you smoke? Yes <sub>1</sub> No <sub>2</sub> How many cigarettes per day? \_\_\_\_\_
- c. Do you drink alcoholic beverages? Yes <sub>1</sub> No <sub>2</sub> How often? \_\_\_\_\_
- d. Have you had any previous surgeries? List them.  
\_\_\_\_\_
- e. Do you have any allergies to medication, food? List them.  
\_\_\_\_\_

**4. Family History**

Please write down any serious or chronic conditions in your family members.

- |                               |                   |
|-------------------------------|-------------------|
| a. Mother _____               | I don't know ____ |
| b. Father _____               | I don't know ____ |
| c. Children _____             | I don't know ____ |
| d. Siblings _____             | I don't know ____ |
| e. Maternal Granmother _____  | I don't know ____ |
| f. Maternal Grandfather _____ | I don't know ____ |
| g. Paternal Grandmother _____ | I don't know ____ |
| h. Paternal Grandfather _____ | I don't know ____ |

**5. MEDICINES (OTC or prescription/herbal medicines/ alternative medicine).**

**Please write down the names of the medication you have taken in the LAST WEEK.**

**a. Medication:** (tablets, pills, injections, drops)

- (1) \_\_\_\_\_ How many times a day? \_\_\_\_\_
- (2) \_\_\_\_\_ How many times a day? \_\_\_\_\_
- (3) \_\_\_\_\_ How many times a day? \_\_\_\_\_
- (4) \_\_\_\_\_ How many times a day? \_\_\_\_\_
- (5) \_\_\_\_\_ How many times a day? \_\_\_\_\_

**b. Remedies:**

- (1) \_\_\_\_\_ How many times a day? \_\_\_\_\_

**c. Treatments:**

- (1) \_\_\_\_\_ How many times a day? \_\_\_\_\_

**d. I cannot recall the name:**

- (1) \_\_\_\_\_ How many times a day? \_\_\_\_\_

**6. Are any of the medications you take bothersome in any way (pills, creams, injections, drops)?**

Yes <sub>1</sub> No <sub>2</sub>

**7. If you answered yes, please write down the medicine and indicate how much it bothers you (not alot, some what, a lot) and in what way.**

| Medication | Not a lot                             | Some<br>what                          | A lot                                 | How does it bother you? |
|------------|---------------------------------------|---------------------------------------|---------------------------------------|-------------------------|
| _____      | <input type="checkbox"/> <sub>1</sub> | <input type="checkbox"/> <sub>2</sub> | <input type="checkbox"/> <sub>3</sub> | _____                   |
| _____      | <input type="checkbox"/> <sub>1</sub> | <input type="checkbox"/> <sub>2</sub> | <input type="checkbox"/> <sub>3</sub> | _____                   |
| _____      | <input type="checkbox"/> <sub>1</sub> | <input type="checkbox"/> <sub>2</sub> | <input type="checkbox"/> <sub>3</sub> | _____                   |
| _____      | <input type="checkbox"/> <sub>1</sub> | <input type="checkbox"/> <sub>2</sub> | <input type="checkbox"/> <sub>3</sub> | _____                   |

**8. In the last 6 have you stopped taking your medication for any reason:**

- a. Unable to afford the medication Sí <sub>1</sub> No <sub>2</sub>
- b. Side effects Sí <sub>1</sub> No <sub>2</sub>
- c. Forgetfulness Sí <sub>1</sub> No <sub>2</sub>
- d. Fear of dependancy Sí <sub>1</sub> No <sub>2</sub>
- e. Fear that it can be harmful Sí <sub>1</sub> No <sub>2</sub>
- f. You felt better Sí <sub>1</sub> No <sub>2</sub>
- g. Different reason: \_\_\_\_\_ Sí <sub>1</sub> No <sub>2</sub>

**9. What is the reason for your clinic visit today?**

---



---



---

**10. Please write down any questions/concerns you wish to discuss with your doctor:**

a. **Regarding your medication:** (For example: reactions to your medications, how to take your medications, problems getting your medications)

---

---

---

---

b. **Other ways to improve your health:** (For example: increasing physical activity, improving your diet, decreasing alcohol intake, smoking cessation)

---

---

---

---

c. **Other important things:** (For example: emotional problems, any problems with your partner, family problems, laboratory test results)

---

---

---

---

**11. If you wish, you may use these lines to write down anything else you want to bring up during your clinic visit today.**

---

---

---

---

---

---

---

---

---

---

**Pre-Visit Intake Form**

ID \_\_\_\_\_

1. What is your birth date? \_\_\_\_\_

2. What is your sex/gender? <sub>1</sub> Male <sub>2</sub> Female

3. Is this health center where you primarily get your care? <sub>1</sub> Yes <sub>2</sub> No

4. Do you have a personal physician assigned to you who provides most of your care? <sub>1</sub> Yes <sub>2</sub> No

5. When was the last time you came to this health center for a clinic visit for your own health care?

- <sub>1</sub> In the past three months
- <sub>2</sub> Between three and six months ago
- <sub>3</sub> Between six and 12 months ago
- <sub>4</sub> Over 12 months ago
- <sub>5</sub> This is my first clinic visit here

6. Do you know how to read and write? <sub>1</sub> Yes <sub>2</sub> No

7. What is the highest grade of school that you completed?

- <sub>1</sub> I did not complete primary education
- <sub>2</sub> I completed primary school
- <sub>3</sub> Less than HS graduate
- <sub>4</sub> High school graduate or GED
- <sub>5</sub> Some tech or vocational school
- <sub>6</sub> Some college or more

8. How confident are you filling out forms by yourself

- <sub>1</sub> Not at all
- <sub>2</sub> A little
- <sub>3</sub> Some what
- <sub>4</sub> Quite a bit
- <sub>5</sub> Extremely

9. In general, how would you rate your health?

- <sub>1</sub> Poor
- <sub>2</sub> Fair
- <sub>3</sub> Good
- <sub>4</sub> Very good
- <sub>5</sub> Excellent

10 For which health conditions do you or should you be taking medication?

---

---

Below is a list of problems that people sometimes have with their medicines. Please check how hard it is for you to do each of the following:

- |                                                                    | Very Hard                             | Some what hard                        | Not Hard at All                       |                                       |                                       |
|--------------------------------------------------------------------|---------------------------------------|---------------------------------------|---------------------------------------|---------------------------------------|---------------------------------------|
| 11. Remember to take all the pills                                 | <input type="checkbox"/> <sub>1</sub> | <input type="checkbox"/> <sub>2</sub> | <input type="checkbox"/> <sub>3</sub> |                                       |                                       |
| 12. Get your refills in time                                       | <input type="checkbox"/> <sub>1</sub> | <input type="checkbox"/> <sub>2</sub> | <input type="checkbox"/> <sub>3</sub> |                                       |                                       |
| 13. Take so many pills at the same time                            | <input type="checkbox"/> <sub>1</sub> | <input type="checkbox"/> <sub>2</sub> | <input type="checkbox"/> <sub>3</sub> |                                       |                                       |
| 14. How well you know the instructions for taking your medication? |                                       |                                       |                                       |                                       |                                       |
|                                                                    | I do not know                         | A little                              | Some what                             | I know                                | I know very well                      |
|                                                                    | <input type="checkbox"/> <sub>1</sub> | <input type="checkbox"/> <sub>2</sub> | <input type="checkbox"/> <sub>3</sub> | <input type="checkbox"/> <sub>4</sub> | <input type="checkbox"/> <sub>5</sub> |

Please indicate how confident you are when answering the following statements.

- |                                                                                                       | Not at all confident                  | A little confident                    | Some what confident                   | Confident                             | Very confident                        |
|-------------------------------------------------------------------------------------------------------|---------------------------------------|---------------------------------------|---------------------------------------|---------------------------------------|---------------------------------------|
| 15. How confident are you in your ability to get a doctor to answer all your questions?               | <input type="checkbox"/> <sub>1</sub> | <input type="checkbox"/> <sub>2</sub> | <input type="checkbox"/> <sub>3</sub> | <input type="checkbox"/> <sub>4</sub> | <input type="checkbox"/> <sub>5</sub> |
| 16. How confident are you in your ability to make the most of your visit with a doctor?               | <input type="checkbox"/> <sub>1</sub> | <input type="checkbox"/> <sub>2</sub> | <input type="checkbox"/> <sub>3</sub> | <input type="checkbox"/> <sub>4</sub> | <input type="checkbox"/> <sub>5</sub> |
| 17 How confident are you in your ability to get a doctor to take your chief health concern seriously? | <input type="checkbox"/> <sub>1</sub> | <input type="checkbox"/> <sub>2</sub> | <input type="checkbox"/> <sub>3</sub> | <input type="checkbox"/> <sub>4</sub> | <input type="checkbox"/> <sub>5</sub> |

18. In the last 12 months, how often did your personal physician involve you in making decisions about your care as much as you wanted?

- | Never                                 | Sometimes                             | Usually                               | Always                                | No visits in the last 12 months       |
|---------------------------------------|---------------------------------------|---------------------------------------|---------------------------------------|---------------------------------------|
| <input type="checkbox"/> <sub>1</sub> | <input type="checkbox"/> <sub>2</sub> | <input type="checkbox"/> <sub>3</sub> | <input type="checkbox"/> <sub>4</sub> | <input type="checkbox"/> <sub>5</sub> |

19. In the last 12 months, how often did your personal physician seem to understand the kinds of problems you have in carrying out recommended treatments?

- | Never                                 | Sometimes                             | Usually                               | Always                                | No visits in the last 12 months       |
|---------------------------------------|---------------------------------------|---------------------------------------|---------------------------------------|---------------------------------------|
| <input type="checkbox"/> <sub>1</sub> | <input type="checkbox"/> <sub>2</sub> | <input type="checkbox"/> <sub>3</sub> | <input type="checkbox"/> <sub>4</sub> | <input type="checkbox"/> <sub>5</sub> |

Below are some statements that people sometimes make when they talk about their health. Please indicate how much you agree or disagree with each statement as it applies to you personally by checking your answer.

|                                                                                                                              |                                                                   |                                                       |                                                    |                                                                |                                                  |
|------------------------------------------------------------------------------------------------------------------------------|-------------------------------------------------------------------|-------------------------------------------------------|----------------------------------------------------|----------------------------------------------------------------|--------------------------------------------------|
| 20 When all is said and done, I am the person who is responsible for taking care of my health.                               | Disagree<br>Strongly<br><br><input type="checkbox"/> <sub>1</sub> | Disagree<br><br><input type="checkbox"/> <sub>2</sub> | Agree<br><br><input type="checkbox"/> <sub>3</sub> | Agree<br>Strongly<br><br><input type="checkbox"/> <sub>4</sub> | N/A<br><br><input type="checkbox"/> <sub>5</sub> |
| 21. Taking an active role in my own health care is the most important thing that affects my health.                          | Disagree<br>Strongly<br><br><input type="checkbox"/> <sub>1</sub> | Disagree<br><br><input type="checkbox"/> <sub>2</sub> | Agree<br><br><input type="checkbox"/> <sub>3</sub> | Agree<br>Strongly<br><br><input type="checkbox"/> <sub>4</sub> | N/A<br><br><input type="checkbox"/> <sub>5</sub> |
| 22. I am confident I can help prevent or reduce problems associated with my health.                                          | Disagree<br>Strongly<br><br><input type="checkbox"/> <sub>1</sub> | Disagree<br><br><input type="checkbox"/> <sub>2</sub> | Agree<br><br><input type="checkbox"/> <sub>3</sub> | Agree<br>Strongly<br><br><input type="checkbox"/> <sub>4</sub> | N/A<br><br><input type="checkbox"/> <sub>5</sub> |
| 23. I know what each of my prescribed medications do.                                                                        | Disagree<br>Strongly<br><br><input type="checkbox"/> <sub>1</sub> | Disagree<br><br><input type="checkbox"/> <sub>2</sub> | Agree<br><br><input type="checkbox"/> <sub>3</sub> | Agree<br>Strongly<br><br><input type="checkbox"/> <sub>4</sub> | N/A<br><br><input type="checkbox"/> <sub>5</sub> |
| 24. I am confident that I can tell whether I need to go to the doctor or whether I can take care of a health problem myself. | Disagree<br>Strongly<br><br><input type="checkbox"/> <sub>1</sub> | Disagree<br><br><input type="checkbox"/> <sub>2</sub> | Agree<br><br><input type="checkbox"/> <sub>3</sub> | Agree<br>Strongly<br><br><input type="checkbox"/> <sub>4</sub> | N/A<br><br><input type="checkbox"/> <sub>5</sub> |
| 25. I am confident that I can tell a doctor concerns I have even when he or she does not ask.                                | Disagree<br>Strongly<br><br><input type="checkbox"/> <sub>1</sub> | Disagree<br><br><input type="checkbox"/> <sub>2</sub> | Agree<br><br><input type="checkbox"/> <sub>3</sub> | Agree<br>Strongly<br><br><input type="checkbox"/> <sub>4</sub> | N/A<br><br><input type="checkbox"/> <sub>5</sub> |
| 26. I am confident that I can follow through on medical treatments I may need to do at home.                                 | Disagree<br>Strongly<br><br><input type="checkbox"/> <sub>1</sub> | Disagree<br><br><input type="checkbox"/> <sub>2</sub> | Agree<br><br><input type="checkbox"/> <sub>3</sub> | Agree<br>Strongly<br><br><input type="checkbox"/> <sub>4</sub> | N/A<br><br><input type="checkbox"/> <sub>5</sub> |
| 27. I understand my health problems and what causes them.                                                                    | Disagree<br>Strongly<br><br><input type="checkbox"/> <sub>1</sub> | Disagree<br><br><input type="checkbox"/> <sub>2</sub> | Agree<br><br><input type="checkbox"/> <sub>3</sub> | Agree<br>Strongly<br><br><input type="checkbox"/> <sub>4</sub> | N/A<br><br><input type="checkbox"/> <sub>5</sub> |
| 28. I know the different treatments that are available for my health problems.                                               | Disagree<br>Strongly<br><br><input type="checkbox"/> <sub>1</sub> | Disagree<br><br><input type="checkbox"/> <sub>2</sub> | Agree<br><br><input type="checkbox"/> <sub>3</sub> | Agree<br>Strongly<br><br><input type="checkbox"/> <sub>4</sub> | N/A<br><br><input type="checkbox"/> <sub>5</sub> |

<sub>1</sub>                      <sub>2</sub>                      <sub>3</sub>                      <sub>4</sub>                      <sub>5</sub>

29. I am confident that I can maintain lifestyle changes, like eating right and exercising, even during times of stress.                      Disagree Strongly                      Disagree                      Agree                      Agree Strongly                      N/A

<sub>1</sub>                      <sub>2</sub>                      <sub>3</sub>                      <sub>4</sub>                      <sub>5</sub>

30. I am satisfied with my daily diet? <sub>1</sub> Yes                      <sub>2</sub> No

If you answered no, why not? \_\_\_\_\_

31. I would like to improve my diet? <sub>1</sub> Yes                      <sub>2</sub> No

If you answered yes, state how you would like to improve (for example, I want to eat less fat, eat more fruit, drink less sodas)

\_\_\_\_\_

32. I think I eat enough fruits? <sub>1</sub> Yes                      <sub>2</sub> No

33. Generally, how many servings of fruit do you in a day? (For example, one serving includes a medium-sized apple, a half-cup of grapes, or a quarter-cup of raisins): \_\_\_\_\_

34. I think I eat enough vegetables? <sub>1</sub> Yes                      <sub>2</sub> No

35. Generally, how many servings of vegetables do you in a day? (For example, a cup of carrots, a medium sized corn, a salad) \_\_\_\_\_

36. In the past 7 days, how many days did you eat meals high in fat, such as red meat or pork, whole milk, half and half, cheese, or fast food? \_\_\_\_\_ days (0–7)

37. In the past 7 days, how many days did you engage in physical activity (such as swimming, walking, running, riding a bike) in addition to work? \_\_\_\_\_ days (0–7)

38. In the past 7 days, how many days did you engage in at least 30 minutes of physical activity? Such as washing clothes, cleaning the house, walking to work). \_\_\_\_\_ days (0–7)

*In the past 6 months, how difficult was it to follow through with your doctor's recommendations?*

39. Exercising regularly:

- <sub>1</sub> Impossible
- <sub>2</sub> Very difficult
- <sub>3</sub> Difficult
- <sub>4</sub> Not very difficult

- <sub>5</sub> Easy
- <sub>6</sub> Does not apply to me

If you had problems following through, state why

---

40. Eating what the doctor recommended:

- <sub>1</sub> Impossible
- <sub>2</sub> Very difficult
- <sub>3</sub> Difficult
- <sub>4</sub> Not very difficult
- <sub>5</sub> Easy
- <sub>6</sub> Does not apply to me

If you had problems following through, state why

---

*Please state if in the last 6 months:*

41. The food you bought was not enough, and you did not have enough money to buy more.

- <sub>1</sub> Often
- <sub>2</sub> Some times
- <sub>3</sub> Never

42. You could not afford to buy meat, fish or eggs

- <sub>1</sub> Often
- <sub>2</sub> Some times
- <sub>3</sub> Never



**Post-Visit Questionnaire**

ID: \_\_\_\_\_

1. When thinking about your clinic visit today, indicate how much you agree or disagree with each statement:

|                                                                                          | Disagree Strongly                     | Disagree                              | Neutral                               | Agree                                 | Agree Strongly                        |
|------------------------------------------------------------------------------------------|---------------------------------------|---------------------------------------|---------------------------------------|---------------------------------------|---------------------------------------|
| a. I am completely satisfied with today's visit.                                         | <input type="checkbox"/> <sub>1</sub> | <input type="checkbox"/> <sub>2</sub> | <input type="checkbox"/> <sub>3</sub> | <input type="checkbox"/> <sub>4</sub> | <input type="checkbox"/> <sub>5</sub> |
| b. I accomplished everything I wanted to during today's visit.                           | <input type="checkbox"/> <sub>1</sub> | <input type="checkbox"/> <sub>2</sub> | <input type="checkbox"/> <sub>3</sub> | <input type="checkbox"/> <sub>4</sub> | <input type="checkbox"/> <sub>5</sub> |
| c. The doctor provided enough time to explain the reason for my clinic visit.            | <input type="checkbox"/> <sub>1</sub> | <input type="checkbox"/> <sub>2</sub> | <input type="checkbox"/> <sub>3</sub> | <input type="checkbox"/> <sub>4</sub> | <input type="checkbox"/> <sub>5</sub> |
| d. The doctor gave me all the information I needed regarding my health and my treatment. | <input type="checkbox"/> <sub>1</sub> | <input type="checkbox"/> <sub>2</sub> | <input type="checkbox"/> <sub>3</sub> | <input type="checkbox"/> <sub>4</sub> | <input type="checkbox"/> <sub>5</sub> |
| e. The doctor explained what I need to do if my symptoms worsen.                         | <input type="checkbox"/> <sub>1</sub> | <input type="checkbox"/> <sub>2</sub> | <input type="checkbox"/> <sub>3</sub> | <input type="checkbox"/> <sub>4</sub> | <input type="checkbox"/> <sub>5</sub> |
| f. I felt confident in asking my doctor's questions.                                     | <input type="checkbox"/> <sub>1</sub> | <input type="checkbox"/> <sub>2</sub> | <input type="checkbox"/> <sub>3</sub> | <input type="checkbox"/> <sub>4</sub> | <input type="checkbox"/> <sub>5</sub> |
| g. My doctor took interest in all of the concerns I brought up today.                    | <input type="checkbox"/> <sub>1</sub> | <input type="checkbox"/> <sub>2</sub> | <input type="checkbox"/> <sub>3</sub> | <input type="checkbox"/> <sub>4</sub> | <input type="checkbox"/> <sub>5</sub> |

2. Is there something you wish the doctor would do differently next time? <sub>1</sub> Yes <sub>2</sub> No

---

---

---

3. From the questions you wrote down before your clinic visit:

QUESTION/CONCERN

---

- a. Did you ask this question or discuss this issue with your doctor? <sub>1</sub> Yes <sub>2</sub> No
- b. What is the treatment plan you and your doctor discussed regarding this issue?
- 
- c. Are you completely satisfied with this plan? <sub>1</sub> Yes <sub>2</sub> No
- d. Do you still have questions regarding this issue? <sub>1</sub> Yes <sub>2</sub> No
- 

QUESTION/CONCERN

---

- a. Did you ask this question or discuss this issue with your doctor? <sub>1</sub> Yes <sub>2</sub> No
- b. What is the treatment plan you and your doctor discussed regarding this issue?
- 
- c. Are you completely satisfied with this plan? <sub>1</sub> Yes <sub>2</sub> No
- d. Do you still have questions regarding this issue? <sub>1</sub> Yes <sub>2</sub> No
- 

QUESTION/CONCERN

---

- a. Did you ask this question or discuss this issue with your doctor? <sub>1</sub> Yes <sub>2</sub> No
- b. What is the treatment plan you and your doctor discussed regarding this issue?
- 
- c. Are you completely satisfied with this plan? <sub>1</sub> Yes <sub>2</sub> No
- d. Do you still have questions regarding this issue? <sub>1</sub> Yes <sub>2</sub> No
- 

4. Did you feel that filling out the questionnaire beforehand helped you get more out of your visit?
- No, no help
  - Yes, helped a little
  - Yes, helped some what
  - Yes, helped a lot

5. Would you like to fill out a similar questionnaire every time you seek medical care to improve your clinic visits?
- <sub>1</sub> Yes <sub>2</sub> No

6. What changes would you recommend to improve the questionnaire you filled out? (For example, make the questionnaire shorter/longer, easier working, use larger/smaller font, increase/reduce the help with filling out the questionnaire)
- 
-
